1 Methods Section- Applied and Environmental Microbiology

2

3

4 **Optimization of subsampling, decontamination, and DNA extraction of difficult peat**  
5 **and silt permafrost samples**

6

7 Alireza Saidi-Mehrabad<sup>1</sup>, Patrick Neuberger<sup>1</sup>, Maria Cavaco<sup>1</sup>, Duane Froese<sup>2</sup>, and Brian  
8 Lanoil<sup>1,\*</sup>

9

10 <sup>1</sup>Department of Biological Sciences, University of Alberta, Edmonton, Alberta, T6G  
11 2E9, Canada

12 <sup>2</sup>Department of Earth and Atmospheric Sciences, Edmonton, Alberta, T6G 2E3, Canada

13 \*Correspondence: [brian.lanoil@ualberta.ca](mailto:brian.lanoil@ualberta.ca)

14

15

16 **RUNNING TITLE**

17 Efficient methods in obtaining clean DNA from permafrost

18

19

20

21

22

23

24

25 **ABSTRACT**

26 This study aims to act as a methodological guide for contamination monitoring,  
27 decontamination, and DNA extraction for peaty and silty permafrost samples with low  
28 biomass or difficult to extract DNA. We applied a biological tracer, either only in the  
29 field or both in the field and in the lab, via either spraying or painting. Spraying in the  
30 field followed by painting in the lab resulted in a uniform layer of the tracer on the core  
31 sections. A combination of bleaching, washing, and scraping resulted in complete  
32 removal of the tracer leaving sufficient material for DNA extraction, while other widely  
33 used decontamination methods did not remove all detectable tracer. In addition, of four  
34 widely used commercially available DNA extraction kits, only a modified  
35 ZymoBIOMICS™ DNA Microprep kit was able to acquire PCR amplifiable DNA.  
36 Permafrost chemical parameters, age, and soil texture did not have an effect on  
37 decontamination efficacy; however, the permafrost type did influence DNA extraction.  
38 Based on these findings, we developed recommendations for permafrost microbiologists  
39 to acquire contaminant-free DNA from permafrost with low biomass.

40 **IMPORTANCE:**

41 Permafrost has the capacity to preserve microbial and non-microbial genomic material for  
42 millennia; however, major challenges are associated with permafrost samples, including  
43 decontamination of samples and acquiring pure DNA. Contamination of samples during  
44 coring and post coring handling and processing could affect downstream analyses and  
45 interpretations. Despite the use of multiple different decontamination and DNA extraction  
46 methods in studies of permafrost, the efficacy of these methods is not well known. We  
47 used a biological tracer to test the efficacy of previously published decontamination  
48 methods, as well as a bleach-based method we devised, on two chemically and  
49 structurally different permafrost core sections. Our method was the only one that  
50 removed all detectable tracer. In addition, we tested multiple DNA extraction kits and  
51 modified one that is able to acquire pure, PCR amplifiable DNA from silty, and to some  
52 extent from peaty, permafrost samples.

53

54

55

56 **Key words:** Permafrost; Subsampling and decontamination; DNA extraction; 16S rRNA  
57 gene PCR; Contamination detection; Permafrost Microbiome

## 58 INTRODUCTION

59

60 Permafrost, i.e. Earth materials below 0°C for at least two years and up to millions of  
61 years, acts as an archive of past environments and ecosystems, preserving biological  
62 material as a result of its isolation from atmospheric inputs, low temperatures, and low  
63 water activity (1). Ancient DNA derived from long-dead organisms is an important  
64 example of such material and has been used for a variety of purposes, ranging from  
65 reconstructing human migration patterns to reconstituting the genomes of extinct  
66 organisms such as the woolly mammoth and North American horses (2-6). Furthermore,  
67 permafrost-dwelling microbes may also play important roles in carbon cycling by  
68 conversion of permafrost organic carbon to methane and carbon dioxide, both important  
69 greenhouse gasses (7-10). The use of high-throughput sequencing technologies has  
70 enriched our understanding of microbial communities in permafrost and ancient DNA.  
71 However, these technologies require the extraction of high yields of DNA devoid of  
72 contaminants (11).

73

74 Obtaining DNA devoid of contaminants from environmental samples, especially from  
75 those with low biomass such as permafrost, is often challenging. Such samples are prone  
76 to external contamination during drilling and collection in the field and handling in the  
77 laboratory, which could lead to misinterpretation of microbial diversity, activity, or  
78 ancient DNA studies (12-14). External contamination is particularly problematic in DNA-  
79 based approaches due to the high sensitivity in detecting, amplifying and sequencing of  
80 DNA. Several methods have been used for permafrost decontamination, such as scraping  
81 the outer surface of cores, fracturing of cores followed by clean subsampling from the

82 interior of the core sections (i.e. “disk sampling”), or washing the cores with DNase (e.g.  
83 (15-17); Table S1). Either scraping or disk sampling are the most commonly used  
84 protocols (Table S1); however, the efficacy of these methods in removing external  
85 contaminants is not well characterized (see, for example, (12)).

86

87 Ancient DNA (aDNA) and deep subsurface (both sediment and ice) microbiology studies  
88 face similar challenges to permafrost DNA studies, with high potential for contamination  
89 due to low endogenous cell and DNA abundance in the samples. Such studies have  
90 formalized highly stringent sampling and decontamination protocols, with protocols to  
91 minimize contamination and controls to monitor contamination at all stages from  
92 sampling to downstream analyses (e.g. (18-24)). Similar approaches may be beneficial for  
93 permafrost studies. For example, a unique tracer or combination of tracers added during  
94 drilling is used to monitor contamination in deep subsurface microbiology studies (25).  
95 Similar tracers have also been used in permafrost microbiology, but only rarely (e.g. (26-  
96 28)). Likewise, many decontamination methods have been systematically tested for  
97 ancient DNA studies of skeletal remains. Some of these methods, such as scraping (29)  
98 and disk sampling (30), have been used for permafrost decontamination as well.

99 However, other methods used for aDNA studies of bone, including UV irradiation (31),  
100 and treatment with household bleach (32) have not been tested on permafrost intended for  
101 microbial work. Bleaching, in particular, has proven to be highly effective in removing  
102 external contaminants without damaging the genomic material within the samples in both  
103 ancient remains and ice cores (20, 32-34).

104

105 Another major issue in permafrost molecular studies is low DNA yield and poor quality  
106 of isolated DNA due to co-extracted chemical inhibitors (35-37). Permafrost researchers  
107 have utilized either commercial DNA extraction kits, most of which are based on  
108 mechanical disruption followed by DNA purification, or chemical DNA extraction  
109 protocols. Commercial mechanical disruption-based kits provide consistent DNA yield  
110 (although yield differs significantly between kits) and similar community composition,  
111 while chemical DNA extraction approaches are less consistent (38). Issues with co-  
112 extraction of chemical inhibitors have led some researchers to add extra purification  
113 steps. In some cases (e.g. 39-41), additional purification can lead to a loss of DNA or  
114 biases in the evaluation of community structure, although observable bias is not always  
115 seen (e.g. 38). To our knowledge, there have been no comparative studies assessing the  
116 efficacy of commercial kits for DNA extraction of difficult permafrost samples of  
117 different textures and chemistry.

118

119 In this study, we tested the efficacy of several decontamination methods on permafrost  
120 with the aid of a microbial tracer. In addition, we compared DNA yield and purity for  
121 four widely used commercially available soil DNA extraction kits with peaty and silty  
122 permafrost samples, with and without modifications of the manufacturer's protocol. We  
123 developed recommendations for permafrost researchers for sample handling and  
124 processing, contamination detection and control, and DNA extraction.

125

126

127

## 128 **MATERIALS AND METHODS**

### 129 **Site description and sampling strategies**

130 A 3.97 m long, 10 cm diameter continuous permafrost core (termed DHL-16) was  
131 collected in May, 2016 adjacent to cores collected and presented previously (2 m lateral;  
132 GPS: 65.21061N, and 138.32208W; Fig. 1) (42). Two intervals of this core were sampled  
133 for this study. The first was a lower silt unit (from a depth of 254 cm to 336 cm, here  
134 called DH-2) dating to the Pleistocene, between 11,650 and 15,710 cal yr BP based on  
135 radiocarbon dating and age modelling (42). The second was an upper peat unit (from a  
136 depth of 105 cm to 212 cm, here called DH-1) dating to the early Holocene between  
137 8,190 and 10,380 cal yr BP. The organic/silt boundary was determined at 244 cm  
138 (~10,400 cal yr BP), placing the DH\_2 core segment right around the start of the  
139 Holocene geological epoch.

140

141 The surface material at our sampling site was approximately 2.5 m below the surface of  
142 surrounding undisturbed sites. To access the frozen permafrost table, we removed  
143 approximately 10-20 cm of thawed material with a shovel. The core was extracted by  
144 vertical drilling with a gas-powered drill with a custom-made diamond bit. Upon  
145 removing the core segments from the core catcher, the organic materials stuck to the  
146 surface of the core were scraped off with a clean pocket knife and the core was  
147 immediately sprayed with our contamination tracer (see below). Frozen core segments  
148 were placed in heat-sealed clear plastic bags (ULine, Canada), placed in coolers with ice  
149 packs for the duration of coring, and then stored at -20°C during transportation and  
150 subsequent analyses. At the University of Alberta, the DH\_1 and DH\_2 core segments  
151 were cut vertically into  $\frac{1}{3}$  and  $\frac{2}{3}$  subsections with the aid of a masonry saw. The  $\frac{2}{3}$

152 section was used to test decontamination and DNA extraction protocols, while the  $\frac{1}{3}$   
153 section was used for chemical analyses

154

#### 155 **Contamination tracer**

156 Approximately  $2.8 \times 10^7$  cells/ml of *Escherichia coli* strain DH10B harboring a pBAD  
157 vector (ThermoFisher Scientific, Canada), suspended in a total of 50 ml  $1\times$  PBS, was  
158 sprayed from a spray bottle on the core catcher, diamond bits, and the surface of the  
159 frozen cores (43-45). pBAD is an expression vector that codes for the mNeonGreen  
160 protein. This vector and its product was targeted as the main contamination tracer in this  
161 study via PCR of vector sequences and macro-photography of the mNeonGreen protein  
162 fluorescence under 470 nm wavelength using a xenon arc lamp (Sutter Instruments;  
163 California, USA).

164

#### 165 **Sterilization procedure of the tools and work areas**

166 To maintain cleanliness in the sub-sampling laboratory environment, we followed  
167 recommendations for ancient DNA and deep subsurface microbiological work (21, 46).  
168 These recommendations include the use of Tyvek clothing covers, masks, and gloves;  
169 sterilization of all equipment via baking, bleaching, or both; subsampling in a class 1000  
170 clean space with no history of DNA extraction or PCR amplification of DNA; and  
171 monitoring of the space for potential contaminants. For full details, see supplemental  
172 methods.

173

174

175



176 **Basic chemical parameter analyses of the core segments**

177 The  $\frac{1}{3}$  core sections of DH\_1 and DH\_2 were cut into 1-cm<sup>3</sup> cubes with a handsaw in a  
178 4°C cold room. The analyses of water content, organic carbon content, and pH were  
179 determined based on standard methods (see supplemental methods for details).

180

181 **Decontamination and subsampling methods**

182 To prepare the samples for intentional contamination and decontamination, the  $\frac{2}{3}$  section  
183 of each core segment was cut horizontally into multiple disks (Fig. S2). Except for the  
184 piece selected for the decontamination protocol g (see below), one side of the disks was  
185 painted with a total of  $5.3 \times 10^8$  cells ml<sup>-1</sup> of *E.coli* with pBAD suspended in 1× PBS  
186 using a 25 mm paintbrush. The other side was not painted in the laboratory and thus any  
187 spike present was the result of spraying in the field. For decontamination protocol g, the  
188 disk was cut into three rectangular subsections (Fig. S2). One rectangular piece was  
189 painted with the spike as above, another painted with a total of 18 µg of pBAD vector  
190 DNA isolated using QIAprep® Spin Miniprep Kit, by the manufacturer's instructions  
191 (MO Bio, Qiagen Canada), and the third piece was not painted in the laboratory (Fig. S2).

192

193 Seven decontamination methods were tested in this study: a) scraping off external,  
194 potentially contaminated material by shaving the exterior of the cores 4-5 times with a  
195 series of 0.012"/0.30 mm single edge blades (i.e. "scraping", modified from (17)). b)  
196 Sampling of a fresh, uncontaminated face with brass fitters (1/2" O.D. × 1.2" O.D.)  
197 (similar to (16) with the only difference being that brass fitters were used instead of a  
198 stationary drill press (i.e. "disk sampling")); c) disk sampling as in protocol b, but using a  
199 soil press for volumetric subsampling (similar to (47)). Protocol c was performed with a

200 set of high-pressure 30 cm long and 1.5 mm thick stainless steel tubing. d) Disk sampling  
201 as in protocol b, but using a hammer, chisel and a hand saw to remove the outer,  
202 contaminated material (similar to (48), with the only difference being that a manual hand  
203 saw was used instead of an electric jigsaw, no clamps were utilized, and the cores were  
204 not cut into cubes). e) A combination of scraping and disk sampling with chisels and  
205 blades (similar to (35), with the only difference being that single edge blades were used  
206 instead of knives). f) UV irradiation of the disk (modified from (29)). In protocol f, a disk  
207 was placed in a clean, closed UV box (UVP C-70G Chromato-Vue® Cabinet; Analytik  
208 Jena, USA) ~6 cm from the UV lamp of 15 watts and was subjected to UV light at 254  
209 nm for 5 min ( $8.45 \times 10^{-17}$  J/m<sup>2</sup> UV dosage), 10 min ( $1.69 \times 10^{-16}$  J/m<sup>2</sup> UV dosage), 20  
210 min ( $3.38 \times 10^{-16}$  J/m<sup>2</sup> UV dosage) or 30 min ( $5.07 \times 10^{-16}$  J/m<sup>2</sup> UV dosage) intervals. g)  
211 Scraping and bleaching (developed for this study based on (32, 33)). In protocol g, the  
212 surface of the rectangular piece was first washed with pre-chilled (4°C), full strength  
213 concentrated household bleach solution with no phosphorus compounds. Bleach was  
214 rinsed off with pre-chilled (4°C) Milli-Q water. The resulting loosened surface materials  
215 were removed via scraping with 0.012"/0.30 mm heavy duty single edge blades (Richard  
216 Ltd, Quebec Canada). This entire process was then repeated a second time. Unlike  
217 protocols a-f, protocol g started with subsampling first and then decontamination (Fig.  
218 S2).

219

220 Decontaminated samples were stored at -20°C prior to DNA extraction. Decontaminated  
221 samples obtained from protocols (a and c-f) were crushed into smaller pieces with a  
222 sterile chisel and hammer and prior to DNA extraction, they were allowed to thaw at  
223 room temperature. Thawed material was homogenized by mixing and the resulting

224 material was subsampled for DNA work. Soils in brass fitters obtained via protocol (b)  
225 were left at room temperature prior to DNA extraction to allow easy removal of the  
226 material with the aid of a sterilized spatula and were later mixed and subsampled.

227

## 228 **DNA extraction**

229 We compared seven DNA extraction protocols: four commercially available, well-  
230 established soil DNA extraction kits as recommended by the manufacturers as well as  
231 modifications to three of these commercial kits (see supplemental material for details of  
232 the modifications). The protocols used for soil DNA extraction were as follows: 1) Fast  
233 DNA<sup>TM</sup> SPIN kit for soil (MP Biomedicals, California, USA) by the manufacturer's  
234 protocol; 2) Fast DNA<sup>TM</sup> SPIN kit for soil (MP Biomedicals, California, USA) with  
235 modifications; 3) OMEGA E.Z.N.A soil DNA kit (OMEGA-Bio-Tek, Georgia, USA) by  
236 the manufacturer's protocol; 4) Powersoil<sup>®</sup> Isolation kit (MO Bio Laboratories/Qiagen,  
237 Canada) by the manufacturer's protocol; 5) Powersoil<sup>®</sup> Isolation kit (MO Bio  
238 Laboratories/Qiagen, Canada) with modifications; 6) ZymoBIOMICS<sup>TM</sup> DNA Microprep  
239 kit (Zymo Research, California, USA), by the manufacturer's protocol; and 7)  
240 ZymoBIOMICS<sup>TM</sup> DNA Microprep kit (Zymo Research, California, USA) with  
241 modifications. DNA yield was determined using a Qubit fluorometer device (Invitrogen,  
242 Ontario, Canada) via Quant-iT dsDNA HS Assay Kit (Invitrogen, Canada), calibrated  
243 using the manufacturer's protocol. DNA was extracted from triplicate 1 g subsamples for  
244 DH\_1 and DH\_2, and triplicate 0.5 g subsamples from the control soil (CS; see below).  
245 A positive control soil sample (termed CS in this manuscript) was used to test the  
246 efficiency of each DNA extraction protocol (mentioned below) in obtaining contaminant  
247 free and PCR amplifiable DNA from a non-permafrost sample. The CS sample was an

248 8:1 ratio of peat and mineral subsoils from the rhizosphere of *Populus tremuloides*, mixed  
249 using a clean cement mixer for 10 minutes. Two blank negative controls with no soil  
250 added were prepared from each kit to trace possible contamination originating from kit  
251 reagents.

252

### 253 **Contamination detection**

254 To determine if a decontamination procedure was successful, the isolated DNA was  
255 tested for the presence of pBAD-vector via PCR (see supplemental methods for PCR  
256 protocol details).

257

### 258 **16S rRNA gene-targeted PCR protocol**

259 16S rRNA genes were PCR amplified from the DNA obtained from the decontaminated  
260 samples to test for their PCR amplifiability, here used as a proxy for DNA purity. For  
261 more information, refer to supplemental methods.

262

263 **RESULTS**

264

265 **Chemical characteristics of core sections DH\_1 and DH\_2**

266 The DH\_1 segment was a peaty unit with high organic matter content (mean = 95.7%  
267 w/w dried ( $\pm 1.82\%$ ), n = 23), high gravimetric water content (mean = 91.8% w/w  
268 ( $\pm 3.01$ ), n = 23), and low pH (mean = 3.68 ( $\pm 0.102$ ), n = 24). DH\_2 segment was a silty  
269 unit with lower organic matter content (mean = 39.58% w/w dried ( $\pm 21.85\%$ ), n = 21),  
270 lower gravimetric water content (mean = 74.48% w/w ( $\pm 18.02\%$ ), n = 21), and higher  
271 pH (mean = 6.04 ( $\pm 0.54$ ), n = 30) (Figure S1). The organic matter content range for  
272 DH\_1 was relatively consistent (90.56% - 98.02%) (Fig S1). However, DH\_2 varied  
273 widely in organic content (9.91% - 68.36%). A similar trend was observed regarding  
274 gravimetric water content, with the DH\_1 fairly consistent (80.88-98.33%), but DH\_2  
275 samples varying dramatically (8.15-97.61%). pH did not change significantly in DH\_1  
276 with depth; however, the pH increased significantly with depth for DH\_2, from 5.17 to  
277 6.9 (Fig. S1).

278

279 **Decontamination testing**

280 To test our decontamination protocol, we applied *E. coli* carrying a mNeonGreen protein  
281 expression vector to our core sections as a tracer. The tracer was applied by spraying the  
282 corer and the core sections in the field and/or by painting the core sections in the lab.  
283 Painting of the tracer on the core sections showed a uniform distribution of cells based on  
284 fluorescence of mNeonGreen protein as well as consistent amplification of the pBAD  
285 vector PCR product from all samples prior to decontamination (data not shown). The side

286 of the disk where tracer was only applied in the field resulted in patches of spike and  
287 inconsistent amplification of the vector. However, the crystallized ice from the interior of  
288 the bags used for transporting the core sections always showed positive PCR  
289 amplification of the vector, indicating that the tracer was easily removed from the surface  
290 of the core. In addition, we noticed cutting the samples and handing in the lab resulted in  
291 the loss of the contamination tracer. Hence, we recommend the application of the tracer  
292 by painting prior to decontamination, as well as field application by spraying, to ensure  
293 decontamination is as thorough as possible.

294

295 Of the seven decontamination methods, scraping (protocol a) and UV irradiation  
296 (protocol f) retained the most material for subsequent biological work (Table 1).  
297 Conversely, disk decontamination with brass fitters (protocol b) was the most destructive,  
298 resulting in a very small quantity of decontaminated material. The soil press method  
299 (protocol c) did not perform well, resulting in crushing and thawing of the disk and  
300 bending of the tubes. Protocols d (disk sampling with chisel removal of outer material), e  
301 (disk sampling with scraping), and g (scraping and bleaching) resulted in a moderate  
302 quantity of samples for biological work (Table 1).

303

304 The DNA from the soil samples was extracted via DNA extraction protocol 7 and tested  
305 via PCR of the pBAD vector. The decontaminated samples from protocols b and g were  
306 devoid of PCR amplifiable pBAD vector, indicating effective decontamination (Table 1).  
307 Decontaminated samples from protocols (a) and (c-f) resulted in amplification of the  
308 pBAD vector when tested with PCR, indicating incomplete decontamination. Protocols a-  
309 f resulted in colony formation on growth media left open in the room during

310 decontamination, indicating contamination of the local environment. Such contamination  
311 could lead to subsequent cross-contamination of other samples. Protocol (g) was the only  
312 method that did not show colony formation on nearby growth media (Table 1). Thus,  
313 protocol (g) provided complete decontamination and a moderate amount of  
314 decontaminated material remaining, and therefore seems to be the best decontamination  
315 protocol for permafrost samples and was used for subsequent DNA extraction testing.

316

### 317 **DNA extraction testing**

318 Following decontamination with protocol (g), DNA was extracted from the two  
319 permafrost samples as well as a positive control temperate soil (CS). The kits and  
320 protocols tested displayed varying efficiency and effectiveness in extracting DNA (Table  
321 2). Protocol 1 did not result in any detectable DNA when it was used on either permafrost  
322 sample, but it resulted in the highest yield of DNA from CS (Table 2). Detectable, but  
323 low, DNA yield from DH\_2 was obtained with Protocol 2 and Protocol 5; however,  
324 neither of these protocols provided detectable DNA from DH\_1 (Table 2). Protocol 3  
325 resulted in DNA yield from DH\_1, DH\_2, and CS (Table 2). Protocol 6, in contrast to  
326 other methods, was able to obtain detectable DNA from DH\_1 and CS, but not DH\_2  
327 (Table 2). Protocol 7 produced DNA from both DH\_1 and DH\_2 (Table 2). All of the  
328 DNA extraction protocols provided high yields of DNA for the positive control temperate  
329 soil, (CS). The CS samples provided 2-3 orders of magnitude more DNA ( $47\times - 754\times$ )  
330 than the permafrost samples, no matter which extraction protocol was utilized (Table 2).  
331 Protocol 3 consistently resulted in PCR amplification from blank extractions, both with  
332 different kit lot numbers and different researchers; as a result, we did not test this protocol  
333 further (Table 2). We tested the purity of DNA obtained from unmodified kit protocols

334 (i.e. protocols 1, 4, and 6) on the CS soil; all kits provided DNA pure enough to PCR  
335 amplify 16S rRNA genes. However, on permafrost soils, DNA from protocols 1 and 2  
336 was not PCR amplifiable for either permafrost sample (Table 2). Several protocols gave  
337 differential results for the two different samples, with protocols 4 and 5 showing better  
338 PCR amplifiability with DH\_2 and protocol 6 showing better PCR amplifiability with  
339 DH\_1 (Table 2). For protocols 4 and 6, DNA yield was below the detection limit;  
340 however, PCR product was obtained (Table 2). Only protocol 7 provided consistently  
341 strong PCR amplification from both permafrost samples (Table 2).

342

## 343 **DISCUSSION**

344

345 Deep subsurface microbiology studies have demonstrated the importance of  
346 contamination detection through the use of tracers (18, 49). Fluorescent latex beads  
347 similar in size to microbes have been used extensively in deep subsurface microbiology  
348 (e.g. (50)) and to a lesser extent in permafrost studies (e.g. (12, 51)) to track potential  
349 contamination during sample acquisition. However, these beads do not mimic microbes  
350 well (12, 52), are subject to quenching and bleaching of fluorescence (22), are labor-  
351 intensive to detect (53), and cannot be detected easily at low levels of contamination (19).  
352 Biological tracers have two major advantages relative to beads: they are biological  
353 particles and thus mimic contaminants better and they can be easily detected at very low  
354 levels by PCR (51). Intact cells that are not found in permafrost that carry a well-  
355 characterized target DNA molecule, such as a plasmid, are an ideal contamination tracer.  
356 In this study, we utilized *E.coli* mNeonGreen-expressing cells, which are a commercial  
357 product and thus are not found in permafrost. This tracer can be visualized by



358 fluorescence of the mNeonGreen protein and the pBAD plasmid is easily detected at low  
359 levels by PCR.

360

361 Applying the tracer to the wrong sampling component or at the wrong time may lead to a  
362 false negative, i.e. the presumption that decontamination is complete when the lack of  
363 detection of the tracer is actually due to loss during handling (12, 18, 51). Based on our  
364 observations, tracer should be applied both to the drilling apparatus and cores in the field  
365 and again in the laboratory; application solely in the field led to inconsistent detection of  
366 tracer even before decontamination. Furthermore, we found that applying the tracer by  
367 painting rather than by spraying provided a more consistent coverage of samples.

368

369 Our results showed that none of the tested decontamination methods were able to  
370 completely remove the tracer except the bleach wash method and disk sampling method  
371 with brass fitters. Bleach is cheap and readily available in comparison to costlier DNase  
372 and RNase decontamination solutions used in the past (15, 32). Bleach was effective in  
373 removing our tracer and left a moderate amount of the material available for subsequent  
374 work. In contrast, while the fitter based protocol used a clean subsampling approach, it  
375 yielded a low quantity of subsamples.

376

377 One possible disadvantage of using bleach for decontaminating permafrost segments is  
378 changes to the chemistry of the samples. We tackled this potential issue by splitting the  
379 core section into separate samples for chemistry and biology (i.e.  $\frac{1}{3}$  and  $\frac{2}{3}$  sections),  
380 which allowed preservation of samples for chemistry work, and a sufficient amount of

381 material for decontamination and DNA extraction. However, if the amount of material  
382 available is restricted, this approach may not be tenable.

383

384 The rest of the tested methods, based on the most commonly used method in published  
385 permafrost studies (i.e. disk sampling or scraping; Table S1) resulted in inconsistent PCR  
386 amplification of the tracer from decontaminated samples. One possible reason for a lack  
387 of decontamination was physical contact of the clean interior pieces with contaminated  
388 materials and dust generation during the subsampling. We noted that our test plates were  
389 contaminated with tracers and other cells during disk sampling methods, likely indicating  
390 the production of contaminated dust or aerosols during processing, similar to previous  
391 findings (23, 54). Thus, methods that minimize dust and aerosol generation are  
392 recommended to decrease the possibility of re-contaminating cleaned samples.

393

394 In the case of scraping, insufficient removal of the contaminated surface of the core  
395 section may have been another reason for detecting the tracer. Bang-Andreasen and  
396 colleagues (12) demonstrated that their intentional contamination spike was still  
397 detectable down to 17 mm depth after coring; thus, scraping, which in our experiment  
398 only removed 2-3 mm after 4-5 scrapes, is insufficient to decontaminate the core. The  
399 ineffectiveness of the scraping method has also been reported in ancient DNA studies  
400 (32). Thus, we strongly recommend against scraping as the sole decontamination method  
401 for permafrost cores.

402

403 In our experiment, commercial DNA extraction kits vary in both DNA yield and purity.

404 In a previous study, the Fast DNA<sup>TM</sup> SPIN kit for soil (MP Biomedicals, California,

405 USA) provided the highest DNA yield from permafrost, although it required further  
406 purification (38). However, in our experiment while the Fast DNA<sup>TM</sup> SPIN kit for soil  
407 gave the highest yield in the control soil, no detectable DNA was obtained from the  
408 permafrost. The modified protocol for ZymoBIOMICS<sup>TM</sup> DNA Microprep kit (Zymo  
409 Research, California, USA) was the only protocol able to yield sufficient PCR  
410 amplifiable DNA. It is unclear whether the same kit or the same modifications will  
411 always provide optimal results; thus, when there is sufficient sample, we recommend  
412 testing of several commercially available kits and modification of those protocols (e.g.  
413 see supplemental methods) to obtain the maximum amount of pure DNA from  
414 permafrost.

415

416 It is critical to utilize DNA extraction blank controls since the kit reagents could  
417 introduce contamination. In one protocol, the negative control for the kit always showed  
418 amplification, indicating contamination from the kit reagents. Contamination via kit  
419 reagents has been observed in other studies as well (e.g. (55)). Eisenhofer and colleagues  
420 (55) have noted and summarized some species from a large variety of microbiome studies  
421 that are regularly found in DNA extraction kits. Thus, it is clear that extraction kits can  
422 and often do introduce contaminants: kits should be selected with care for low biomass  
423 samples such as permafrost that are prone to contamination. Furthermore, extractions  
424 should include extensive positive (control soils) and negative (blank extraction) controls.

425

426 Our results indicate that basic soil chemical parameters did not influence the spike  
427 penetration or decontamination procedures; however, these parameters did affect DNA  
428 extraction yield. The silty core generally provided a higher DNA yield than the peaty

429 core, indicating that permafrost chemical and physical parameters can affect DNA  
430 extraction.

431

## 432 **CONCLUSIONS AND RECOMMENDATIONS**

433

434 We recommend the following to prevent contamination of permafrost samples intended  
435 for microbial work:

- 436 1. A biological spike should be applied both in the field via spraying and in the lab  
437 by painting of the core sections. The spike should be allowed to fully freeze onto  
438 the core. PCR should be used to detect the applied biological tracer: clean  
439 samples should be negative; removed material should be positive.
- 440 2. Ancient DNA protocols for sample handling should be followed whenever  
441 possible (e.g. (21, 46)). These protocols were developed to minimize external  
442 contamination and cross-contamination between samples. These protocols are  
443 evolving and should be updated regularly. We have provided a summary of these  
444 guidelines in this manuscript (see supplemental methods for details)
- 445 3. Combined bleach wash and shaving are the most effective method for  
446 decontaminating permafrost samples intended for DNA work. We recommend  
447 against utilizing only disk decontamination or scraping, as these approaches did  
448 not remove our tracer.
- 449 4. Multiple DNA extraction kits should be tested for the specific samples, with both  
450 positive (temperate soil) and negative (reagents only) controls. In our experiment,  
451 modified ZymoBIOMICS™ DNA Microprep kit (Zymo Research, California,  
452 USA) was the most effective method in extracting DNA from silty permafrost

453 and to some extent from peaty permafrost; however, other samples may respond  
454 better to other DNA extraction protocols.

455

## 456 **ACKNOWLEDGMENTS**

457

458 We would like to thank Dr. Lauren Davies for assistance with radiocarbon dating and  
459 chronology of the cores, Ali Naeimi Nezamabad for assistance with the sampling location  
460 map, Sasiri Bandara, Casey Buchanan, and Joseph Young for assisting us in obtaining the  
461 permafrost core segments, and Tania Strilets for editing the current manuscript. We would  
462 like to extend our thanks to the University of Alberta (UANRA grant) and Polar  
463 Knowledge Canada (NSTP grant) for their student financial support. We would like to  
464 thank the following people for their insightful comments, support and allowing us to use  
465 their equipment: Dr. Martin Sharp, John Sherman, Suzan Gater, Richard Mah, and Dr.  
466 Alberto Reyes. We are grateful to Zymo Research and Cedarlane<sup>®</sup> labs for their  
467 generous donation of the DNA extraction kits and guidance.

468

469

470 **REFERENCES**

- 471  
472 1. Willerslev E, Hansen AJ, Binladen J, Brand TB, Gilbert MTP, Shapiro B, Bunce  
473 M, Wiuf C, Gilichinsky DA, Cooper A. 2003. Diverse plant and animal genetic  
474 records from Holocene and Pleistocene sediments. *Science* 300:791-795.  
475 2. Birks HJB, Birks HH. 2016. How have studies of ancient DNA from sediments  
476 contributed to the reconstruction of Quaternary floras? *New Phytologist* 209:499-  
477 506.  
478 3. Froese D, Westgate J, Preece S, Storer J. 2002. Age and significance of the late  
479 Pleistocene Dawson tephra in eastern Beringia. *Quaternary Science Reviews*  
480 21:2137-2142.  
481 4. Orlando L, Ginolhac A, Zhang G, Froese D, Albrechtsen A, Stiller M, Schubert  
482 M, Cappellini E, Petersen B, Moltke I. 2013. Recalibrating Equus evolution using  
483 the genome sequence of an early Middle Pleistocene horse. *Nature* 499:74.  
484 5. Poinar HN, Schwarz C, Qi J, Shapiro B, MacPhee RD, Buigues B, Tikhonov A,  
485 Huson DH, Tomsho LP, Auch A. 2006. Metagenomics to paleogenomics: large-  
486 scale sequencing of mammoth DNA. *science* 311:392-394.  
487 6. Waters MR, Stafford TW. 2007. Redefining the age of Clovis: implications for  
488 the peopling of the Americas. *Science* 315:1122-1126.  
489 7. Davidson EA, Janssens IA. 2006. Temperature sensitivity of soil carbon  
490 decomposition and feedbacks to climate change. *Nature* 440:165.  
491 8. Mackelprang R, Waldrop MP, DeAngelis KM, David MM, Chavarria KL,  
492 Blazewicz SJ, Rubin EM, Jansson JK. 2011. Metagenomic analysis of a  
493 permafrost microbial community reveals a rapid response to thaw. *Nature*  
494 480:368.  
495 9. Nikrad MP, Kerkhof LJ, Häggblom MM. 2016. The subzero microbiome:  
496 microbial activity in frozen and thawing soils. *FEMS microbiology ecology*  
497 92:fiw081.  
498 10. Schuur EA, Bockheim J, Canadell JG, Euskirchen E, Field CB, Goryachkin SV,  
499 Hagemann S, Kuhry P, Lafleur PM, Lee H. 2008. Vulnerability of permafrost  
500 carbon to climate change: Implications for the global carbon cycle. *BioScience*  
501 58:701-714.  
502 11. Shendure J, Balasubramanian S, Church GM, Gilbert W, Rogers J, Schloss JA,  
503 Waterston RH. 2017. DNA sequencing at 40: past, present and future. *Nature*  
504 550:345.  
505 12. Bang-Andreasen T, Schostag M, Priemé A, Elberling B, Jacobsen CS. 2017.  
506 Potential microbial contamination during sampling of permafrost soil assessed by  
507 tracers. *Scientific Reports* 7:43338.  
508 13. Salter SJ, Cox MJ, Turek EM, Calus ST, Cookson WO, Moffatt MF, Turner P,  
509 Parkhill J, Loman NJ, Walker AW. 2014. Reagent and laboratory contamination  
510 can critically impact sequence-based microbiome analyses. *BMC Biology* 12:87.  
511 14. Willerslev E, Hansen AJ, Poinar HN. 2004. Isolation of nucleic acids and cultures  
512 from fossil ice and permafrost. *Trends in Ecology & Evolution* 19:141-147.  
513 15. Au - Barbato RA, Au - Garcia-Reyero N, Au - Foley K, Au - Jones R, Au -  
514 Courville Z, Au - Douglas T, Au - Perkins E, Au - Reynolds CM. 2016. Removal  
515 of Exogenous Materials from the Outer Portion of Frozen Cores to Investigate the

- 516 Ancient Biological Communities Harbored Inside. *JoVE*  
517 doi:doi:10.3791/54091:e54091.
- 518 16. D'Costa VM, King CE, Kalan L, Morar M, Sung WWL, Schwarz C, Froese D,  
519 Zazula G, Calmels F, Debruyne R, Golding GB, Poinar HN, Wright GD. 2011.  
520 Antibiotic resistance is ancient. *Nature* 477:457.
- 521 17. Rivkina E, Petrovskaya L, Vishnivetskaya T, Krivushin K, Shmakova L, Tutukina  
522 M, Meyers A, Kondrashov F. 2016. Metagenomic analyses of the late Pleistocene  
523 permafrost – additional tools for reconstruction of environmental conditions.  
524 Journal Name: *Biogeosciences*; Journal Volume: 13; Journal Issue: 7; Conference:  
525 null; Patent File Date: null; Patent Priority Date: null; Other Information: null;  
526 Related Information: null; Medium: X; Size: 2207 to 2219; Quantity: null; OS:  
527 null; Compatibility: null; Other: null.
- 528 18. Kallmeyer J. 2017. Chapter Three - Contamination Control for Scientific Drilling  
529 Operations, p 61-91. *In* Sariaslani S, Gadd GM (ed), *Advances in Applied*  
530 *Microbiology*, vol 98. Academic Press.
- 531 19. Kallmeyer J, Mangelsdorf K, Cragg B, Horsfield B. 2006. Techniques for  
532 Contamination Assessment During Drilling for Terrestrial Subsurface Sediments.  
533 *Geomicrobiology Journal* 23:227-239.
- 534 20. Korlević P, Gerber T, Gansauge M-T, Hajdinjak M, Nagel S, Aximu-Petri A,  
535 Meyer M. 2015. Reducing microbial and human contamination in DNA  
536 extractions from ancient bones and teeth. *BioTechniques* 59:87-93.
- 537 21. Llamas B, Valverde G, Fehren-Schmitz L, Weyrich LS, Cooper A, Haak W.  
538 2017. From the field to the laboratory: Controlling DNA contamination in human  
539 ancient DNA research in the high-throughput sequencing era. *STAR: Science &*  
540 *Technology of Archaeological Research* 3:1-14.
- 541 22. Yanagawa K, Nunoura T, McAllister S, Hirai M, Breuker A, Brandt L, House C,  
542 Moyer C, Birrien J-L, Aoike K, Sunamura M, Urabe T, Mottl M, Takai K. 2013.  
543 The first microbiological contamination assessment by deep-sea drilling and  
544 coring by the D/V Chikyu at the Iheya North hydrothermal field in the Mid-  
545 Okinawa Trough (IODP Expedition 331). *Frontiers in Microbiology* 4.
- 546 23. Yang DY, Watt K. 2005. Contamination controls when preparing archaeological  
547 remains for ancient DNA analysis. *Journal of Archaeological Science* 32:331-336.
- 548 24. Bollongino R, Tresset A, Vigne J-D. 2008. Environment and excavation: Pre-lab  
549 impacts on ancient DNA analyses. *Comptes Rendus Palevol* 7:91-98.
- 550 25. David C. Smith AJSMRFSAHHS. 2000. Tracer-Based Estimates of Drilling-  
551 Induced Microbial Contamination of Deep Sea Crust. *Geomicrobiology Journal*  
552 17:207-219.
- 553 26. Krivushin K, Kondrashov F, Shmakova L, Tutukina M, Petrovskaya L, Rivkina E.  
554 2015. Two Metagenomes from Late Pleistocene Northeast Siberian Permafrost.  
555 *Genome Announcements* 3:e01380-14.
- 556 27. Vishnivetskaya TA, Petrova MA, Urbance J, Ponder M, Moyer CL, Gilichinsky  
557 DA, Tiedje JM. 2006. Bacterial Community in Ancient Siberian Permafrost as  
558 Characterized by Culture and Culture-Independent Methods. *Astrobiology* 6:400-  
559 414.
- 560 28. Wright GD, Poinar H. 2012. Antibiotic resistance is ancient: implications for drug  
561 discovery. *Trends in Microbiology* 20:157-159.



- 562 29. Kalmár T, Bachrati CZ, Marcsik A, Raskó I. 2000. A simple and efficient method  
563 for PCR amplifiable DNA extraction from ancient bones. *Nucleic Acids Research*  
564 28:e67-e67.
- 565 30. Palmirotta R, Verginelli F, Di Tota G, Battista P, Cama A, Caramiello S, Capasso  
566 L, Mariani-Costantini R. 1997. Use of a multiplex polymerase chain reaction  
567 assay in the sex typing of DNA extracted from archaeological bone. *International*  
568 *Journal of Osteoarchaeology* 7:605-609.
- 569 31. González-Oliver A, Márquez-Morfín L, Jiménez JC, Torre-Blanco A. 2001.  
570 Founding Amerindian mitochondrial DNA lineages in ancient Maya from Xcaret,  
571 Quintana Roo. *American Journal of Physical Anthropology* 116:230-235.
- 572 32. Kemp BM, Smith DG. 2005. Use of bleach to eliminate contaminating DNA from  
573 the surface of bones and teeth. *Forensic Science International* 154:53-61.
- 574 33. Rogers SO, Theraisnathan V, Ma LJ, Zhao Y, Zhang G, Shin S-G, Castello JD,  
575 Starmer WT. 2004. Comparisons of Protocols for Decontamination of  
576 Environmental Ice Samples for Biological and Molecular Examinations. *Applied*  
577 *and Environmental Microbiology* 70:2540-2544.
- 578 34. Salamon M, Tuross N, Arensburg B, Weiner S. 2005. Relatively well preserved  
579 DNA is present in the crystal aggregates of fossil bones. *Proceedings of the*  
580 *National Academy of Sciences of the United States of America* 102:13783-13788.
- 581 35. Mackelprang R, Burkert A, Haw M, Mahendrarajah T, Conaway CH, Douglas  
582 TA, Waldrop MP. 2017. Microbial survival strategies in ancient permafrost:  
583 insights from metagenomics. *The ISME Journal* 11:2305.
- 584 36. Vishnivetskaya T, Kathariou S, McGrath J, Gilichinsky D, Tiedje JM. 2000. Low-  
585 temperature recovery strategies for the isolation of bacteria from ancient  
586 permafrost sediments. *Extremophiles* 4:165-173.
- 587 37. Yergeau E, Hogues H, Whyte LG, Greer CW. 2010. The functional potential of  
588 high Arctic permafrost revealed by metagenomic sequencing, qPCR and  
589 microarray analyses. *The ISME Journal* 4:1206.
- 590 38. Vishnivetskaya TA, Layton AC, Lau MCY, Chauhan A, Cheng KR, Meyers AJ,  
591 Murphy JR, Rogers AW, Saarunya GS, Williams DE, Pfiffner SM, Biggerstaff JP,  
592 Stackhouse BT, Phelps TJ, Whyte L, Saylor GS, Onstott TC. 2014. Commercial  
593 DNA extraction kits impact observed microbial community composition in  
594 permafrost samples. *FEMS Microbiology Ecology* 87:217-230.
- 595 39. Braid MD, Daniels LM, Kitts CL. 2003. Removal of PCR inhibitors from soil  
596 DNA by chemical flocculation. *Journal of Microbiological Methods* 52:389-393.
- 597 40. Griffiths RI, Whiteley AS, O'Donnell AG, Bailey MJ. 2000. Rapid Method for  
598 Coextraction of DNA and RNA from Natural Environments for Analysis of  
599 Ribosomal DNA- and rRNA-Based Microbial Community Composition. *Applied*  
600 *and Environmental Microbiology* 66:5488-5491.
- 601 41. Porter TM, Golding GB, King C, Froese D, Zazula G, Poinar HN. 2013.  
602 Amplicon pyrosequencing late Pleistocene permafrost: the removal of putative  
603 contaminant sequences and small-scale reproducibility. *Molecular Ecology*  
604 *Resources* 13:798-810.
- 605 42. Porter TJ, Schoenemann SW, Davies LJ, Steig EJ, Bandara S, Froese DG. 2019.  
606 Recent summer warming in northwestern Canada exceeds the Holocene thermal  
607 maximum. *Nature Communications* 10:1631.



- 608 43. Durfee T, Nelson R, Baldwin S, Plunkett G, Burland V, Mau B, Petrosino JF, Qin  
609 X, Muzny DM, Ayele M, Gibbs RA, Csörgő B, Pósfai G, Weinstock GM,  
610 Blattner FR. 2008. The Complete Genome Sequence of *Escherichia*  
611 *coli* DH10B: Insights into the Biology of a Laboratory Workhorse. *Journal*  
612 *of Bacteriology* 190:2597-2606.
- 613 44. Guzman LM, Belin D, Carson MJ, Beckwith J. 1995. Tight regulation,  
614 modulation, and high-level expression by vectors containing the arabinose PBAD  
615 promoter. *Journal of Bacteriology* 177:4121-4130.
- 616 45. Shaner NC, Lambert GG, Chammas A, Ni Y, Cranfill PJ, Baird MA, Sell BR,  
617 Allen JR, Day RN, Israelsson M, Davidson MW, Wang J. 2013. A bright  
618 monomeric green fluorescent protein derived from *Branchiostoma lanceolatum*.  
619 *Nature Methods* 10:407.
- 620 46. Cooper A, Poinar HN. 2000. Ancient DNA: Do It Right or Not at All. *Science*  
621 289:1139-1139.
- 622 47. Bottos EM, Kennedy DW, Romero EB, Fansler SJ, Brown JM, Bramer LM, Chu  
623 RK, Tfaily MM, Jansson JK, Stegen JC. 2018. Dispersal limitation and  
624 thermodynamic constraints govern spatial structure of permafrost microbial  
625 communities. *FEMS Microbiology Ecology* 94.
- 626 48. Hultman J, Waldrop MP, Mackelprang R, David MM, McFarland J, Blazewicz  
627 SJ, Harden J, Turetsky MR, McGuire AD, Shah MB, VerBerkmoes NC, Lee LH,  
628 Mavrommatis K, Jansson JK. 2015. Multi-omics of permafrost, active layer and  
629 thermokarst bog soil microbiomes. *Nature* 521:208.
- 630 49. Smith DC, Spivack AJ, Fisk MR, Haveman SA, Staudigel H. 2000. Tracer-based  
631 estimates of drilling-induced microbial contamination of deep sea crust.  
632 *Geomicrobiology Journal* 17:207-219.
- 633 50. Kallmeyer J, Pockalny R, Adhikari RR, Smith DC, D'Hondt S. 2012. Global  
634 distribution of microbial abundance and biomass in subseafloor sediment.  
635 *Proceedings of the National Academy of Sciences* 109:16213-16216.
- 636 51. Juck DF, Whissell G, Steven B, Pollard W, McKay CP, Greer CW, Whyte LG.  
637 2005. Utilization of Fluorescent Microspheres and a Green Fluorescent Protein-  
638 Marked Strain for Assessment of Microbiological Contamination of Permafrost  
639 and Ground Ice Core Samples from the Canadian High Arctic. *Applied and*  
640 *Environmental Microbiology* 71:1035-1041.
- 641 52. Colwell FS, Pryfogle PA, Lee BD, Bishop CL. 1994. Use of a cyanobacterium as  
642 a particulate tracer for terrestrial subsurface applications. *Journal of*  
643 *Microbiological Methods* 20:93-101.
- 644 53. Friese A, Kallmeyer J, Axel Kitte J, Montaña Martínez I, Bijaksana S, Wagner D.  
645 2017. A simple and inexpensive technique for assessing contamination during  
646 drilling operations. *Limnology and Oceanography: Methods* 15:200-211.
- 647 54. Knapp M, Clarke AC, Horsburgh KA, Matisoo-Smith EA. 2012. Setting the stage  
648 – Building and working in an ancient DNA laboratory. *Annals of Anatomy -*  
649 *Anatomischer Anzeiger* 194:3-6.
- 650 55. Eisenhofer R, Minich JJ, Marotz C, Cooper A, Knight R, Weyrich LS. 2018.  
651 Contamination in low microbial biomass microbiome studies: issues and  
652 recommendations. *Trends in microbiology*.  
653

654 **FINANCIAL DISCLOSURE**

655 This research was made possible by NSERC Discovery Grants (Lanoil and Froese) and  
656 NSERC Northern Research Supplements (Froese). A Yukon Scientists and Explorers  
657 License was acquired from the Yukon Government for coring the permafrost samples.

658

659 **COMPETING INTEREST**

660 The researchers declare no conflict of interest.

661

662 **FIGURES AND TABLES**

663

664

665 TABLE 1. Decontamination methods on permafrost samples DH\_1 and DH\_2.

666

| Protocol <sup>a</sup> | Fraction retained (mass %) |      | Colonies (<1 m away) |      | Colonies (> 1 m away) <sup>e</sup> |      | pBAD amplification <sup>f</sup> |      |
|-----------------------|----------------------------|------|----------------------|------|------------------------------------|------|---------------------------------|------|
|                       | DH_1                       | DH_2 | DH_1                 | DH_2 | DH_1                               | DH_2 | DH_1                            | DH_2 |
| a                     | 94                         | 92   | + <sup>d</sup>       | +    | +/-                                | +/-  | +                               | +    |
| b                     | 7                          | 6    | +                    | +    | +/-                                | +/-  | -                               | -    |
| c <sup>b</sup>        | 0                          | 0    | n.d. <sup>d</sup>    | n.d. | +/-                                | +/-  | +/-                             | +/-  |
| d                     | 40                         | 47   | +                    | +    | +/-                                | +/-  | +/-                             | +/-  |
| e                     | 37                         | 45   | +                    | +    | +/-                                | +/-  | +/-                             | +/-  |
| f                     | 100                        | 100  | +                    | +    | +/-                                | +/-  | +/-                             | +/-  |
| g <sup>c</sup>        | 40                         | 32   | - <sup>f</sup>       | -    | -                                  | -    | -                               | -    |

667 <sup>a</sup> Protocols: a = scraping, b = disk sampling with brass fitters, c = disk sampling with a  
 668 soil press, d = disk sampling with a chisel, hammer and a hand saw, e = combination of  
 669 scraping and disk sampling, f = UV irradiation, g = bleach and scraping. See methods for  
 670 details.

671 <sup>b</sup> This protocol failed to acquire any samples due to bending of the tubing.

672 <sup>c</sup> NOTE: In this protocol, permafrost is first subsampled and then decontaminated; for  
 673 other protocols, decontamination occurs before subsampling (see figure S2).

674 <sup>d</sup> n.d. = not done, + = detected, - = not detected, +/- = inconsistent detection.

675 <sup>e</sup> Colonies formed on nutrient rich media plates placed near work station.

676 <sup>f</sup> PCR amplification of the pBAD plasmid carried by the intentional contaminant.

677 Indicates contamination.

678

679

680 TABLE 2. DNA extraction protocol on samples DH\_1, DH\_2, and CS.

681

682

| Protocol <sup>a</sup> | DNA yield (ng/g) <sup>b</sup> |               |                |                                    | PCR amplification |                 |                   |              |
|-----------------------|-------------------------------|---------------|----------------|------------------------------------|-------------------|-----------------|-------------------|--------------|
|                       | DH_1<br>(±SD)                 | DH_2<br>(±SD) | CS<br>(±SD)    | Kit<br>blank <sup>c</sup><br>(±SD) | DH_1              | DH_2            | CS                | PCR<br>blank |
| 1                     | BDL                           | BDL           | 6633<br>(2310) | BDL                                | - <sup>d</sup>    | -               | +++               | -            |
| 2                     | BDL                           | 2.5<br>(0.1)  | n.d.           | BDL                                | -                 | -               | n.d. <sup>d</sup> | -            |
| 3                     | 24.6<br>(0.2)                 | 31.8<br>(0.2) | 1517<br>(16)   | 60.1<br>(3)                        | + <sup>d</sup>    | +               | +                 | +            |
| 4                     | BDL                           | 10<br>(0.1)   | 660<br>(6.4)   | BDL                                | +                 | ++ <sup>d</sup> | ++                | -            |
| 5                     | BDL                           | 4.6<br>(0.4)  | n.d.           | BDL                                | -                 | ++              | n.d.              | -            |
| 6                     | 0.7<br>(0.1)                  | BDL           | 513<br>(14)    | BDL                                | +++ <sup>d</sup>  | +               | +                 | -            |
| 7                     | 1.1<br>(0.2)                  | 17<br>(0.2)   | n.d.           | BDL                                | +++               | +++             | n.d.              | -            |

683 <sup>a</sup>DNA extraction protocols: 1 = Fast DNA SPIN kit for soil (manufacturer's protocol), 2  
684 = Fast DNATM SPIN kit for soil (modified), 3 = OMEGA E.Z.N.A soil DNA kit  
685 (manufacturer's protocol), 4 = Powersoil Isolation kit (manufacturer's protocol), 5 =  
686 Powersoil Isolation kit (modified), 6 = ZymoBIOMICSTM DNA Microprep kit  
687 (manufacturer's protocol), and 7 = ZymoBIOMICSTM DNA Microprep kit (modified).

688 <sup>b</sup>DNA was extracted from triplicate 1 g subsamples for DH\_1 and DH\_2, and triplicate  
689 0.5 g subsamples from CS.

690 <sup>c</sup>Measured in ng of DNA.

691 <sup>d</sup>BDL = below the detection limit, n.d. = not done, + = weak PCR band, ++ = medium  
692 PCR band, +++ = strong PCR band, - = not detected.

693

694

695

696

697

698

699

700

701

702

703

704

705

706

707

708

709

710

711

712

713 FIGURE 1. Map of Yukon region showing the coring location (DHP174) for DHL\_16

714 core. The location was within the continuous permafrost zone (90-100% permafrost

715 extent).

716

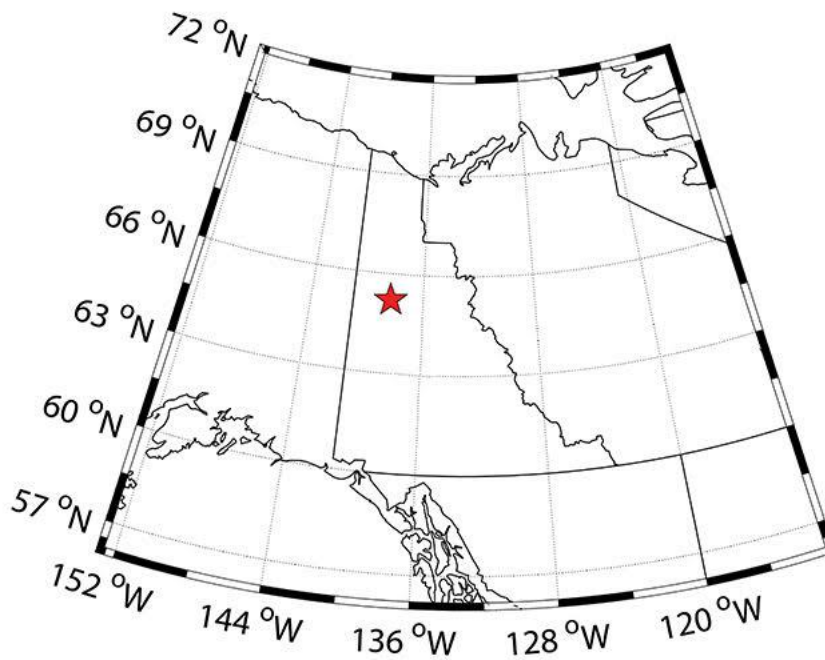

Source: http://biorxiv.org/content/10.1101/2020.01.02.893438v1.full.pdf
